# Supplementary material for: Physicochemical Properties of Dried Apple Slices: Impact of Osmo-Dehydration, Sonication, and Drying Methods
Source: MDPI journal article supplement (doi:10.3390/molecules25051078), 2020-02-28
Supplement: s1 [file s1]

**Table S1.** Attributes of descriptive sensory analysis of dried apples dehydrated (or not) without the application of ultrasound depending on the osmotic substance used.

| Attribute      | ANOVA <sup>†</sup> | Osmotic agent     |                   |                   |                   |
|----------------|--------------------|-------------------|-------------------|-------------------|-------------------|
|                |                    | Xylitol           | Erythritol        | Sucrose           | Without OD        |
| Appearance     |                    |                   |                   |                   |                   |
| Color          | ***                | 4.8 <sup>a</sup>  | 3.2 <sup>b</sup>  | 5.2 <sup>a</sup>  | 4.7 <sup>a</sup>  |
| Basic taste    |                    |                   |                   |                   |                   |
| Sweetness      | ***                | 8.7 <sup>a</sup>  | 7.2 <sup>b</sup>  | 8.4 <sup>a</sup>  | 4.3 <sup>c</sup>  |
| Sourness       | **                 | 2.2 <sup>ab</sup> | 0.5 <sup>c</sup>  | 1.3 <sup>bc</sup> | 2.8 <sup>a</sup>  |
| Bitterness     | ***                | 0.8 <sup>a</sup>  | 0.0 <sup>b</sup>  | 0.0 <sup>b</sup>  | 0.0 <sup>b</sup>  |
| Flavor         |                    |                   |                   |                   |                   |
| Apple ID       | ***                | 6.7 <sup>b</sup>  | 5.8 <sup>c</sup>  | 8.0 <sup>a</sup>  | 3.8 <sup>d</sup>  |
| Fruity         | ***                | 6.5 <sup>b</sup>  | 5.0 <sup>c</sup>  | 7.9 <sup>a</sup>  | 3.3 <sup>d</sup>  |
| Grassy         | **                 | 0.0 <sup>ab</sup> | 0.0 <sup>c</sup>  | 0.5 <sup>a</sup>  | 0.0 <sup>bc</sup> |
| Fresh          | NS                 | 3.0 <sup>a</sup>  | 4.7 <sup>a</sup>  | 1.8 <sup>a</sup>  | 2.2 <sup>a</sup>  |
| Vegetable      | NS                 | 0.5 <sup>a</sup>  | 0.0 <sup>a</sup>  | 0.3 <sup>a</sup>  | 0.1 <sup>a</sup>  |
| Honey/Carmel   | ***                | 5.7 <sup>a</sup>  | 3.7 <sup>b</sup>  | 5.0 <sup>a</sup>  | 0.9 <sup>c</sup>  |
| Citric         | *                  | 0.0 <sup>ab</sup> | 0.0 <sup>b</sup>  | 0.2 <sup>a</sup>  | 0.0 <sup>a</sup>  |
| Off flavor     | NS                 | 0.0 <sup>a</sup>  | 0.0 <sup>a</sup>  | 0.0 <sup>a</sup>  | 0.0 <sup>a</sup>  |
| Aftertaste     | ***                | 5.3 <sup>b</sup>  | 4.0 <sup>b</sup>  | 6.6 <sup>a</sup>  | 3.2 <sup>c</sup>  |
| Cooling effect | ***                | 7.5 <sup>a</sup>  | 7.7 <sup>a</sup>  | 2.4 <sup>b</sup>  | 0.8 <sup>c</sup>  |
| Texture        |                    |                   |                   |                   |                   |
| Hardness       | ***                | 2.3 <sup>bc</sup> | 2.0 <sup>c</sup>  | 2.9 <sup>a</sup>  | 2.3 <sup>b</sup>  |
| Crispiness     | *                  | 1.0 <sup>b</sup>  | 1.0 <sup>b</sup>  | 1.8 <sup>a</sup>  | 1.0 <sup>b</sup>  |
| Adhesiveness   | ***                | 2.0 <sup>b</sup>  | 2.3 <sup>b</sup>  | 3.8 <sup>a</sup>  | 2.3 <sup>b</sup>  |
| Solubility     | ***                | 0.5 <sup>b</sup>  | 3.2 <sup>a</sup>  | 1.8 <sup>b</sup>  | 2.8 <sup>a</sup>  |
| Chewiness      | **                 | 5.0 <sup>a</sup>  | 3.8 <sup>ab</sup> | 3.3 <sup>c</sup>  | 4.0 <sup>bc</sup> |
| Flouriness     | ***                | 0.0 <sup>bc</sup> | 1.7 <sup>a</sup>  | 0.4 <sup>b</sup>  | 0.0 <sup>c</sup>  |

† NS – not significant at  $p = 0.05$ ; \*, \*\* and \*\*\* -- significant at  $p < 0.05$ , 0.01 and 0.001, respectively; the letters denote homogeneous groups; values followed by the same letter, within the same row were not significantly different ( $p = 0.05$ ), according to Tukey's least significant difference test.

**Table S2.** Attributes of descriptive sensory analysis of dried apples dehydrated with the application of ultrasound depending on the osmotic substance used.

| Attribute      | ANOVA <sup>†</sup> | Osmotic agent     |                  |                  |
|----------------|--------------------|-------------------|------------------|------------------|
|                |                    | Xylitol           | Erythritol       | Sucrose          |
| Appearance     |                    |                   |                  |                  |
| Color          | ***                | 4.8 <sup>a</sup>  | 3.2 <sup>b</sup> | 4.7 <sup>a</sup> |
| Basic taste    |                    |                   |                  |                  |
| Sweetness      | ***                | 8.7 <sup>a</sup>  | 6.8 <sup>b</sup> | 8.5 <sup>a</sup> |
| Sourness       | ***                | 2.3 <sup>a</sup>  | 0.7 <sup>c</sup> | 1.3 <sup>b</sup> |
| Bitterness     | ***                | 0.7 <sup>a</sup>  | 0.0 <sup>b</sup> | 0.0 <sup>b</sup> |
| Flavor         |                    |                   |                  |                  |
| Apple ID       | ***                | 6.8 <sup>b</sup>  | 5.3 <sup>c</sup> | 7.3 <sup>a</sup> |
| Fruity         | ***                | 6.3 <sup>b</sup>  | 5.0 <sup>c</sup> | 7.7 <sup>a</sup> |
| Grassy         | ***                | 0.0 <sup>b</sup>  | 0.0 <sup>b</sup> | 0.3 <sup>a</sup> |
| Fresh          | ***                | 2.7 <sup>b</sup>  | 4.2 <sup>a</sup> | 1.7 <sup>c</sup> |
| Vegetable      | ***                | 0.3 <sup>a</sup>  | 0.0 <sup>b</sup> | 0.0 <sup>b</sup> |
| Honey/Carmel   | ***                | 5.8 <sup>a</sup>  | 3.0 <sup>c</sup> | 5.0 <sup>b</sup> |
| Citric         | **                 | 0.0 <sup>b</sup>  | 0.0 <sup>b</sup> | 0.2 <sup>a</sup> |
| Off flavor     | NS                 | 0.0 <sup>a</sup>  | 0.0 <sup>a</sup> | 0.0 <sup>a</sup> |
| Aftertaste     | ***                | 5.2 <sup>b</sup>  | 4.0 <sup>c</sup> | 6.5 <sup>a</sup> |
| Cooling effect | ***                | 7.0 <sup>a</sup>  | 7.5 <sup>a</sup> | 1.7 <sup>b</sup> |
| Texture        |                    |                   |                  |                  |
| Hardness       | *                  | 2.3 <sup>ab</sup> | 1.8 <sup>b</sup> | 2.7 <sup>a</sup> |
| Crispiness     | NS                 | 1.0 <sup>a</sup>  | 1.0 <sup>a</sup> | 1.3 <sup>a</sup> |
| Adhesiveness   | ***                | 2.0 <sup>b</sup>  | 2.0 <sup>b</sup> | 4.2 <sup>a</sup> |
| Solubility     | ***                | 2.2 <sup>b</sup>  | 3.2 <sup>a</sup> | 2.0 <sup>b</sup> |
| Chewiness      | ***                | 5.0 <sup>a</sup>  | 3.8 <sup>b</sup> | 3.7 <sup>b</sup> |
| Flouriness     | ***                | 0.0 <sup>b</sup>  | 1.7 <sup>a</sup> | 0.5 <sup>b</sup> |

† NS – not significant at  $p = 0.05$ ; \*, \*\* and \*\*\* -- significant at  $p < 0.05$ , 0.01 and 0.001, respectively; the letters denote homogeneous groups; values followed by the same letter, within the same row were not significantly different ( $p = 0.05$ ), according to Tukey's least significant difference test.

**Table S3.** Attributes of descriptive sensory analysis of dried apples dehydrated with the application of ultrasound depending on the drying method used.

| Attribute      | ANOVA <sup>†</sup> | Drying method     |                   |                  |
|----------------|--------------------|-------------------|-------------------|------------------|
|                |                    | CD                | VM                | CD/VM            |
| Appearance     |                    |                   |                   |                  |
| Color          | ***                | 4.5 <sup>b</sup>  | 5.5 <sup>a</sup>  | 2.7 <sup>c</sup> |
| Basic taste    |                    |                   |                   |                  |
| Sweetness      | NS                 | 8.0 <sup>a</sup>  | 8.2 <sup>a</sup>  | 7.8 <sup>a</sup> |
| Sourness       | ***                | 1.8 <sup>a</sup>  | 1.2 <sup>b</sup>  | 1.3 <sup>b</sup> |
| Bitterness     | NS                 | 0.2 <sup>a</sup>  | 0.2 <sup>a</sup>  | 0.3 <sup>a</sup> |
| Flavor         |                    |                   |                   |                  |
| Apple ID       | ***                | 6.8 <sup>a</sup>  | 6.3 <sup>b</sup>  | 6.3 <sup>b</sup> |
| Fruity         | *                  | 6.7 <sup>a</sup>  | 6.0 <sup>b</sup>  | 6.3 <sup>b</sup> |
| Grassy         | *                  | 0.2 <sup>a</sup>  | 0.2 <sup>ab</sup> | 0.0 <sup>b</sup> |
| Fresh          | NS                 | 3.2 <sup>a</sup>  | 2.7 <sup>a</sup>  | 2.7 <sup>a</sup> |
| Vegetable      | NS                 | 0.0 <sup>a</sup>  | 0.2 <sup>a</sup>  | 0.2 <sup>a</sup> |
| Honey/Carmel   | NS                 | 4.7 <sup>a</sup>  | 4.7 <sup>a</sup>  | 4.5 <sup>a</sup> |
| Citric         | NS                 | 0.2 <sup>a</sup>  | 0.0 <sup>a</sup>  | 0.0 <sup>a</sup> |
| Off flavor     | NS                 | 0.0 <sup>a</sup>  | 0.0 <sup>a</sup>  | 0.0 <sup>a</sup> |
| Aftertaste     | NS                 | 5.3 <sup>a</sup>  | 5.2 <sup>a</sup>  | 5.2 <sup>a</sup> |
| Cooling effect | NS                 | 5.3 <sup>a</sup>  | 5.8 <sup>a</sup>  | 5.0 <sup>a</sup> |
| Texture        |                    |                   |                   |                  |
| Hardness       | NS                 | 2.0 <sup>a</sup>  | 2.3 <sup>a</sup>  | 2.5 <sup>a</sup> |
| Crispiness     | NS                 | 1.0 <sup>a</sup>  | 1.3 <sup>a</sup>  | 1.0 <sup>a</sup> |
| Adhesiveness   | NS                 | 3.0 <sup>a</sup>  | 2.7 <sup>a</sup>  | 2.5 <sup>a</sup> |
| Solubility     | ***                | 2.7 <sup>a</sup>  | 2.7 <sup>a</sup>  | 2.0 <sup>b</sup> |
| Chewiness      | *                  | 4.3 <sup>ab</sup> | 4.3 <sup>a</sup>  | 3.8 <sup>b</sup> |
| Flouriness     | NS                 | 0.7 <sup>a</sup>  | 0.8 <sup>a</sup>  | 0.7 <sup>a</sup> |

† NS – not significant at  $p = 0.05$ ; \*, \*\* and \*\*\* -- significant at  $p < 0.05$ , 0.01 and 0.001, respectively; the letters denote homogeneous groups; values followed by the same letter, within the same row were not significantly different ( $p = 0.05$ ), according to Tukey's least significant difference test.
